# Supplementary material for: What Enables a Chinese Firm to Create New-to-the-World Innovations? A Historical Case Study of Intrafirm Coopetition in the Instant Messaging Service Sector
Source: Atypon-hosted journal article supplement (doi:10.1287/stsc.2021.0142), 2021-08-17
Supplement: stsc.2021.0142.sm1.pdf [file stsc.2021.0142.sm1.pdf]

## ONLINE SUPPLEMENT TO

### What Enables a Chinese Firm to Create New-To-The-World Innovations?

### A Historical Case Study of Intra-firm Coopetition in the Instant Messaging Service Sector

By Johann Peter Murmann and Zhijing Zhu

## PART 1: INTERVIEW QUESTIONS

### Questions to Interview Technical Department Managers in WeChat Group

#### I. The overview of questions:

1. What have been the five biggest challenges that you faced in developing WeChat into a leading product? How did you try to overcome them?
2. What are the key management techniques that you use to get team members to develop innovative features of WeChat in a timely fashion?
3. How has the relationship between WeChat and QQ (particularly Mobile QQ) changed over time?
4. What are the main reasons for WeChat's success in and out of China?
5. What characteristics of WeChat are most attractive to users?
6. How did you get information on user demands for WeChat?
7. Why has WeChat evolved from an IM app to a wireless Internet platform aiming to connect users with everything?

#### II. Breakdown of the above questions:

1. What have been the five biggest challenges that you faced in developing WeChat into a leading product? How did you try to overcome them?  
Please tell me some stories about the difficulties and your solutions.
2. What are the key management techniques that you use to get the teams to develop innovative features of WeChat in time?
  - (1) What do you regard as the key challenges for creating innovative features?
  - (2) What have you done to overcome these challenges?
  - (3) Did you allow for high autonomy of R&D team members to experiment with new features of WeChat?
  - (4) Did you provide incentives for team members to encourage innovation?
  - (5) Most software projects always take a long time. How did you get your team to develop new versions on time?
  - (6) Did you set up competition between rival teams on purpose? How did you deal with the competitions?

- (7) Did you use particular procedures and criteria to recruit team members?
- (8) Did you have difficulties in keeping your best employees? If so, what did you do?

3. How has the relationship between WeChat and QQ (particularly Mobile QQ) changed over time?

- (1) WeChat did not differ much from Mobile QQ until V2.5 (offering features such as People Nearby and Voice Note), except the Hold to Talk feature in V2.0 and the Receive and Reply to QQ Messages in V2.2. Why did you insist on developing it rather than giving it up?
- (2) Why have WeChat and Mobile QQ continued to offer similar non-profitable features, such as Video/Audio Call, QQ Mail Notification, File Transfer between PC and Smartphones, Payment? Why does WeChat offer features that would reduce users' start-ups of Mobile QQ and effective time spent on Mobile QQ, e.g. receiving and replying to QQ messages? Why did this happen before WeChat gained a large user base? Why are the similar features unavailable in Mobile QQ, due to technical reasons or firm-level policies?
- (3) Why did this also happen to Tencent Weibo and QQ Mail from early on? E.g. together with the launch of the Hold to Talk feature in V2.0 that boosted the first user growth, WeChat offered the feature named Weibo Photo Assistant for beautifying and uploading photos to Tencent Weibo without logging onto Tencent Weibo, as well as the feature named QQ Mail Notification to receive and read QQ mails without logging onto QQ Mail.
- (4) Did WeChat team and Mobile QQ team share technologies with each to develop similar features, E.g. People Nearby in WeChat vs. Look Around in Mobile QQ?
- (5) Why was the Hold to Talk feature available in WeChat 4 months earlier than Mobile QQ, although the feature was said to be built on the voice-chat technology developed by Mobile QQ team early on? (May 10 2011 compared to Sept 20 2011)
- (6) In terms of Payment functions, Mobile QQ team seemed to have the technology a few years earlier than WeChat, but it offered similar features (e.g. Money Transfer) later than WeChat. Why did this happen? On the other hand, the integration of Balance and Money Transfer features seemed to be technically available for WeChat V5.0, but were not launched in WeChat until V5.3.1 (Jun 23 2014), which was three months later than Mobile QQ (Mar 21 2014). Why did this happen?
- (7) WeChat always launches new features first for iPhone, whereas Mobile QQ always does this for Android phones. What are the reasons for this difference?
- (8) Users can switch between WeChat's domestic version and international version by changing language settings from Chinese to English and vice versa, whereas users have to install a separate app QQ International to use the international version of Mobile QQ. What are the reasons for this difference?

4. What are the main reasons for WeChat's success in and out of China?

- (1) What are the main domestic and foreign competitors of WeChat in the Chinese market?
- (2) What was the key to WeChat's success over Xiaomi's MiTalk, which was launched three months earlier than WeChat and attracted a large number of users quickly?
- (3) What are the main reasons for WeChat to win over domestic rivals even if they offer similar features, e.g. Alibaba's Laiwang?
- (4) Has the monthly active users of WeChat exceeded those of Mobile QQ up to now? If this happens someday, what are the main reasons?
- (5) What are the main reasons for WeChat's success in international markets?
- (6) Out of all the reasons for WeChat's success in and out of China, which are applicable to WeChat only but not its rivals?

5. What characteristics of WeChat are most attractive to users?

- (1) If he answers a large number of features, what features of WeChat are most often used per day? Can you provide us with the monthly data of how many minutes per month users spent on

different features of WeChat (e.g. games, online shopping, Moments, IM), how many messages were sent through WeChat?

(2) If he answers the innovativeness of WeChat, what are the main features of WeChat innovated by WeChat team? What are the main features learnt from foreign and domestic competing products, such as QQ (Computer-based QQ and Mobile QQ), Facebook, microblog apps, Instagram, etc.?

(3) If WeChat did not offer many features for the first time in the world, why do you believe WeChat is innovative?

(4) If it is the ease of use, how could you keep it simple to use such a large number of features? Does one person have the final authority of the user interface just as Steve Jobs at Apple had this authority?

(5) If it is the faster update of new versions, how did you control the intervals between every two versions of WeChat? Were the intervals always shorter than rivals? How could you achieve this?

(6) If it is earlier availability of new features than rivals, how could you always launch new features earlier than rivals?

6. How did you get information on user demands for WeChat?

(1) What role did the User Experience Department play?

(2) Which user group's demands did your team pay most attention to, high-end users or low-end users (more exactly, "losers", i.e. "Diao Si" in Chinese)? Which user group accounted for the biggest share of WeChat's monthly active users, high-end users or low-end users?

(3) WeChat always launched new features first for iPhone. Was this because iPhone users are viewed as high-end users?

(4) Did WeChat always have more iPhone users than Android users? Did iPhone users always increase at a faster rate than Android users? Did iPhone users run WeChat more times or spend more time per day on WeChat than Android users do?

Why were there fewer minor-update versions for Android than for iPhone? Was this simply because Android versions were later than iPhone versions?

7. Why has WeChat evolved from an IM app to a wireless Internet platform aiming to connect users with everything?

(1) WeChat features extend step by step from IM to SNS, media, OTO, and finally a wireless Internet platform to connect users with everything. When was this roadmap determined? What was the logic behind this roadmap? Was there a blueprint for this roadmap?

(2) How were WeChat's features determined? E.g. Though voice messages did not account for a large share of all the messages sent via WeChat after the Hold to Talk feature was launched, more voice/audio functions were added to WeChat over time (e.g. Audio call, Walkie-talkie). Why did you keep on investing in voice/audio functions? (To compete with Mobile QQ, YY, Skype, and others?)

(3) How did you decide to build into WeChat the features that were not available in IM apps before, e.g. shaking my phone to identify music?

(4) Did you recall any feature after launching it? Before the launch of new versions, how did you ensure that the features would be accepted by most users?

(5) How did you allocate features to different versions? In what order? E.g. People Nearby feature in V2.5, Walkie-talkie feature and Shaking to identify music feature in V4.5?

(6) How did you allocate the features serving the same purpose to different versions? E.g. for the purpose of voice/audio IM, you launched Hold to Talk feature in V2.0, Video/Audio Call in V4.2, and Walkie-talkie in 4.5. Why didn't you launch them in neighbouring versions?

(7) Why did you accomplish the WeChat payment function with a total of seven versions (nine versions from V5.0 on Aug 5 2013 to V6.0 on Sep 30 2014, excluding V5.2.1 and V5.3)?

(8) Why did you launch the feature of making payment via bank cards covertly in V5.0? I.e. it would not be available until users successfully made one payment in an official account, and only three or four official accounts allowed for payment then.

(8) How did the feature of following Official accounts emerge?

(9) Have you customized the international version of WeChat for different local markets? Can you give me some examples?

**PART 2: SUPPLEMENTARY TABLES AND FIGURES**

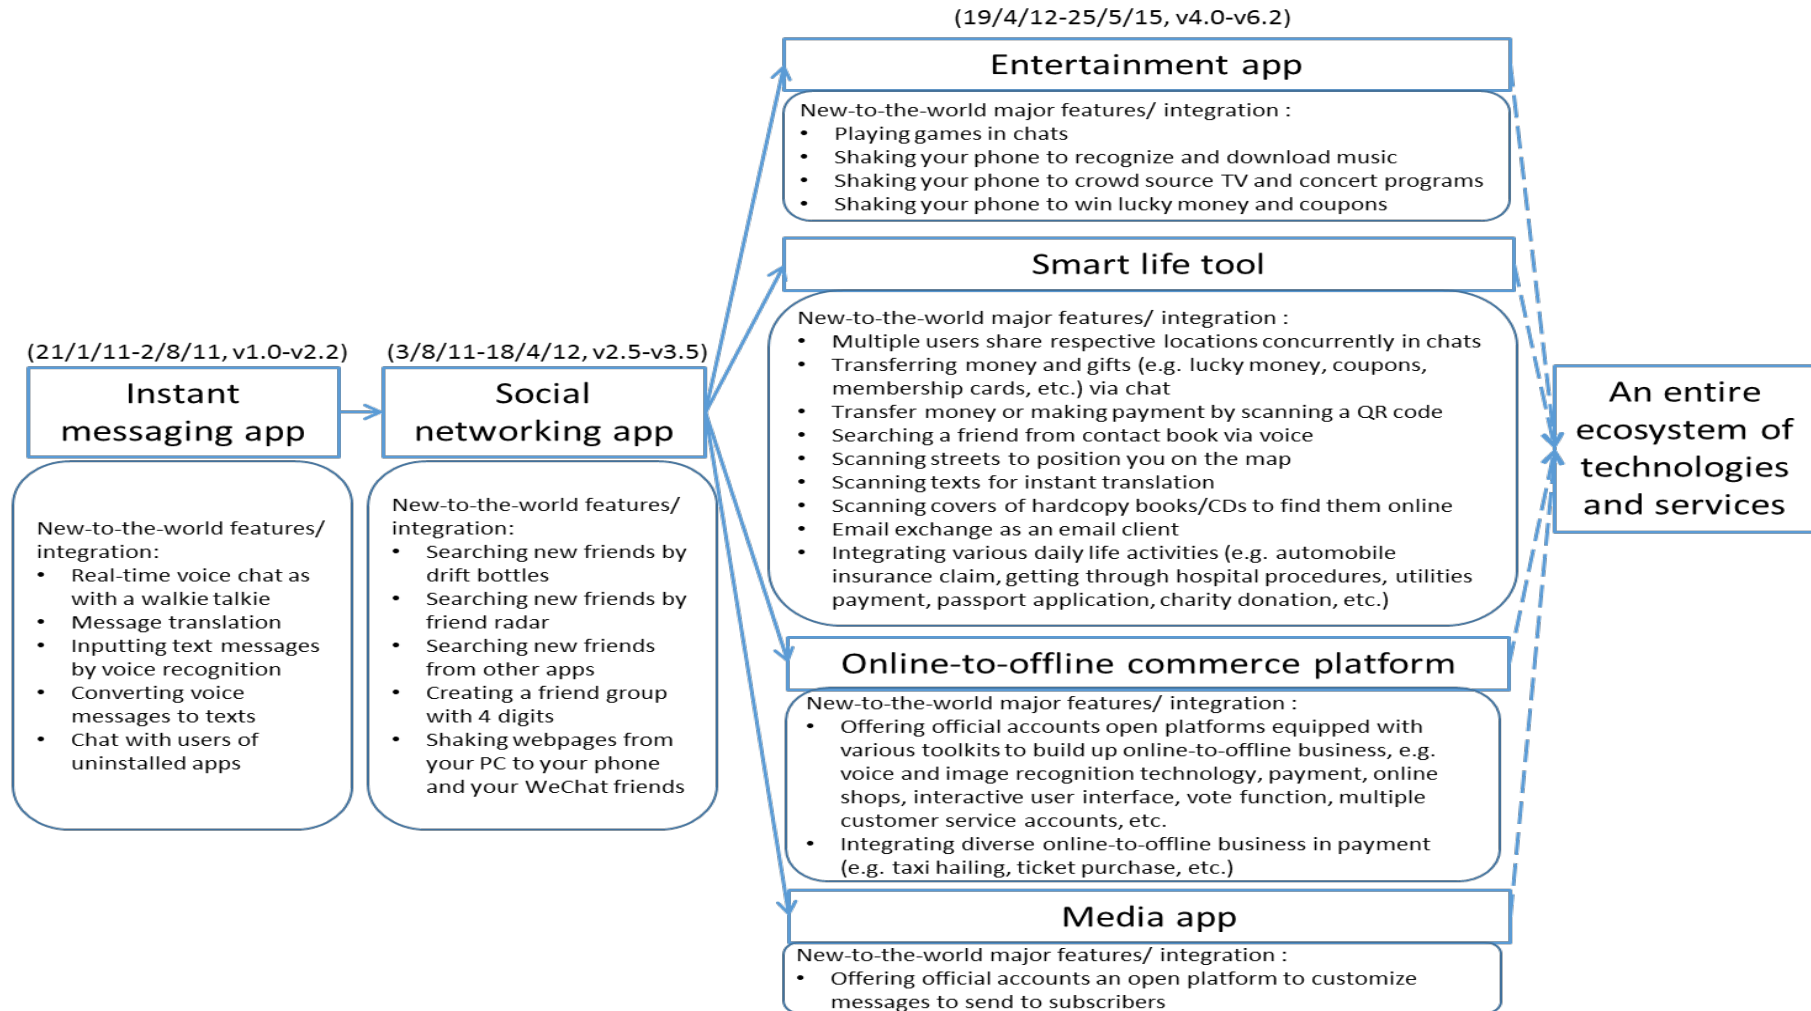

**Figure A1. WeChat’s Functionality Change and Its Main new-to-the-world Features or Integration (Jan 2011-May 2015)**

Data source: The author’s summary based on data as of May 2015.

**Table A1. Timelines of Selected Features of WeChat and Mobile QQ (as of 23/01/2017)**

|                                                                       | WeChat     | Mobile QQ         | WeChat launched first | Mobile QQ launched first | Unavailable in Mobile QQ | Unavailable in WeChat |
|-----------------------------------------------------------------------|------------|-------------------|-----------------------|--------------------------|--------------------------|-----------------------|
| Chat functions                                                        |            |                   |                       |                          |                          |                       |
| Text                                                                  | 21/01/2011 | 2000/4/~          |                       | Yes                      |                          |                       |
| Photos                                                                | 21/01/2011 | 26/10/2010        |                       | Yes                      |                          |                       |
| Send multiple photos at a time to chat                                | 5/02/2013  | 3/07/2013         | Yes                   |                          |                          |                       |
| Photos with a preset lifespan                                         | N/A        | 24/09/2013        |                       |                          |                          | Yes                   |
| Voice (hold to talk)                                                  | 10/05/2011 | 20/09/2011        | Yes                   |                          |                          |                       |
| Chang chat voices                                                     | N/A        | 10/06/2015        |                       |                          |                          | Yes                   |
| Walki-talki voice chat                                                | 5/02/2013  | Later             | Yes                   |                          |                          |                       |
| Input texts via voice                                                 | 5/08/2013  | N/A               |                       |                          | Yes                      |                       |
| Transfer chat voices to chat text                                     | 26/01/2014 | N/A               |                       |                          | Yes                      |                       |
| Videos                                                                | 3/08/2011  | 12/09/2014        | Yes                   |                          |                          |                       |
| Graffiti                                                              | N/A        | 20/09/2011        |                       |                          |                          | Yes                   |
| Anonymous chat                                                        | N/A        | 12/09/2014        |                       |                          |                          | Yes                   |
| Animated stickers                                                     | 20/12/2011 | 26/10/2010        |                       | Yes                      |                          |                       |
| Emoticons                                                             | 6/04/2011  | before 2008       |                       | Yes                      |                          |                       |
| Emoticons automatically triggered while sending wishes in chat        | 19/01/2012 | Later             | Yes                   |                          |                          |                       |
| Customize stickers                                                    | 20/12/2011 | 7/03/2011         |                       | Yes                      |                          |                       |
| Audio stickers                                                        | N/A        | 24/09/2013        |                       |                          |                          | Yes                   |
| Stickers with your own face                                           | N/A        | 10/01/2014        |                       |                          |                          | Yes                   |
| Recommend stickers while chatting with contacts                       | 26/01/2014 | Later             | Yes                   |                          |                          |                       |
| Share sticker series to chat                                          | 26/01/2014 | Later             | Yes                   |                          |                          |                       |
| Frequently used phrases and sentences to choose from as chat response | N/A        | 25/08/2008        |                       |                          |                          | Yes                   |
| Auto response                                                         | N/A        | 30/03/2011        |                       |                          |                          | Yes                   |
| Location                                                              | 19/04/2012 | 9/02/2012         |                       | Yes                      |                          |                       |
| Real-time location sharing in chat                                    | 26/01/2014 | N/A               |                       |                          | Yes                      |                       |
| Navigation as per the location sent by another user via chat          | 5/02/2013  | Later             | Yes                   |                          |                          |                       |
| Contact (name card)                                                   | 19/04/2012 | Later             | Yes                   |                          |                          |                       |
| Music                                                                 | 19/04/2012 | 2008 or earlier   |                       | Yes                      |                          |                       |
| Hyperlinks                                                            | 10/03/2011 | 2008 or earlier   |                       | Yes                      |                          |                       |
| Screenshots                                                           | 5/02/2013  | before 2011/12/16 |                       | Yes                      |                          |                       |
| Send screenshots directly to chat                                     | 5/02/2013  | Later             | Yes                   |                          |                          |                       |
| Send messages to multiple contacts simultaneously (not group chat)    | 19/01/2012 | 26/10/2012        | Yes                   |                          |                          |                       |
| View unread chats                                                     | 21/01/2011 | Early on          |                       | Yes                      |                          |                       |
| Play games in chat                                                    | 14/12/2011 | N/A               |                       |                          | Yes                      |                       |
| Translate chat texts between Chinese and English                      | 8/05/2014  | 29/09/2013        |                       | Yes                      |                          |                       |
| Event reminder                                                        | N/A        | 27/06/2014        |                       |                          |                          | Yes                   |
| Chat with other SN app users                                          | 10/03/2011 | N/A               |                       |                          | Yes                      |                       |
| Voice note to yourself                                                | 3/08/2011  | N/A               |                       |                          | Yes                      |                       |
| Chat with yourself                                                    | 5/02/2013  | N/A               |                       |                          | Yes                      |                       |
| Voice reminder to yourself                                            | 5/02/2013  | N/A               |                       |                          | Yes                      |                       |
| Transfer files in chat                                                |            | 8/05/2013         |                       |                          |                          | Yes                   |
| Transfer money in chat                                                | 23/06/2014 | 27/01/2015        | Yes                   |                          |                          |                       |
| Send and receive red packets in chat                                  | 19/01/2015 | 27/01/2015        | Yes                   |                          |                          |                       |
| Group chat                                                            | 21/03/2011 | 25/08/2008        |                       | Yes                      |                          |                       |
| Group live voice chat                                                 | 5/02/2013  | N/A               |                       |                          | Yes                      |                       |

|                                                                             |            |            |     |     |     |     |
|-----------------------------------------------------------------------------|------------|------------|-----|-----|-----|-----|
| Group anonymous chat                                                        | N/A        | Available  |     |     |     | Yes |
| Remind group chats pertaining to the user                                   | 26/01/2014 | Later      | Yes |     |     |     |
| Forward chat messages                                                       | Available  | 1/11/2012  | Yes |     |     |     |
| Forward photos and videos in chat                                           | 19/04/2012 | Later      | Yes |     |     |     |
| Forward multiple chat messages at a time                                    | 24/10/2013 | 12/09/2014 | Yes |     |     |     |
| Send multiple chat messages to email                                        | 24/10/2013 | N/A        |     |     | Yes |     |
| Recall chat messages                                                        | 23/06/2014 | Later      | Yes |     |     |     |
| Add chats to favourites                                                     | 5/08/2013  | Later      | Yes |     |     |     |
| Stick a chat on the top of all chats                                        | 5/09/2012  | 10/06/2015 | Yes |     |     |     |
| Audio display of messages for visually disabled users                       | N/A        | 10/01/2014 |     |     |     | Yes |
| Multiple chat windows                                                       | N/A        | 25/08/2008 |     |     |     | Yes |
| Turn on or off speaker to listen to voice messages                          | 15/08/2011 | 24/11/2011 | Yes |     |     |     |
| Change chat background                                                      | 14/12/2011 | 16/07/2012 | Yes |     |     |     |
| Change styles of chat message frames                                        | N/A        | 3/07/2013  |     |     |     | Yes |
| Receive and send chat messages via SMS without installing the app in phones | N/A        | 1/12/2011  |     |     |     | Yes |
| Flicker chat windows                                                        | N/A        | 10/05/2012 |     |     |     | Yes |
| Set up words unpermitted to use in group chats                              | N/A        | 27/06/2014 |     |     |     | Yes |
| Forward multiple chat messages to multiple friends at a time                | 1/02/2016  | N/A        |     |     | Yes |     |
| Search chat history                                                         | 5/02/2013  | 30/10/2015 | Yes |     |     |     |
| Backup chat history                                                         | 5/02/2013  | 4/01/2008  |     | Yes |     |     |
| Export chat history                                                         | 24/03/2014 | 7/06/2010  |     | Yes |     |     |
| Move chat history                                                           | 5/02/2013  | 14/05/2008 |     | Yes |     |     |
| Call functions                                                              |            |            |     |     |     |     |
| Audio                                                                       | 19/07/2012 | 10/01/2014 | Yes |     |     |     |
| Customize ringtones for audio call                                          | N/A        | 9/12/2014  |     |     |     | Yes |
| Video                                                                       | 19/07/2012 | 29/07/2011 |     | Yes |     |     |
| Switch between video and audio call                                         | 19/07/2012 | 16/08/2014 | Yes |     |     |     |
| Save video calls to make stickers with your own face                        | N/A        | 21/05/2016 |     |     |     | Yes |
| Add emoticons, filter and special effects to the video call                 | N/A        | 16/09/2016 |     |     |     | Yes |
| Group audio/ video call                                                     | 19/10/2015 | 5/05/2014  |     | Yes |     |     |
| Anonymous group audio call                                                  | N/A        | 12/05/2015 |     |     |     | Yes |
| Make appointments for group video call                                      | N/A        | 10/06/2015 |     |     |     | Yes |
| Switch between mobile phones and PC during audio/ video call                | N/A        | 1/12/2014  |     |     |     | Yes |
| Zoom out the video call window                                              | 20/12/2014 | 6/08/2015  | Yes |     |     |     |
| Beautify users' faces during video call                                     | N/A        | 11/04/2015 |     |     |     | Yes |
| Sharing screens during video call                                           | N/A        | 12/05/2015 |     |     |     | Yes |
| Screen child lock for video call                                            | N/A        | 9/09/2015  |     |     |     | Yes |
| Telephone Call functions                                                    |            |            |     |     |     |     |
| Make phone calls directly to banks, hotels, hotlines etc.                   | N/A        | 12/05/2015 |     |     |     | Yes |
| Find new contacts                                                           |            |            |     |     |     |     |
| ID                                                                          | 21/01/2011 | 2000/4/~   |     | Yes |     |     |
| Other SN app IDs                                                            | 10/03/2011 | N/A        |     |     | Yes |     |
| Phone number                                                                | 8/06/2011  | 10/01/2013 | Yes |     |     |     |
| People nearby                                                               | 3/08/2011  | 10/11/2011 | Yes |     |     |     |
| Respond greetings from strangers and add remarks to strangers               | 5/02/2013  | 1/12/2014  | Yes |     |     |     |
| Interest tribes                                                             | N/A        | 10/01/2014 |     |     |     | Yes |
| Nearby discussion groups                                                    | N/A        | 9/12/2014  |     |     |     | Yes |
| Roaming on map to look for people nearby                                    | N/A        | 9/12/2014  |     |     |     | Yes |

|                                                                                |            |                 |     |     |
|--------------------------------------------------------------------------------|------------|-----------------|-----|-----|
| Add Charm value to people nearby                                               | N/A        | 12/05/2015      |     | Yes |
| Create a chatroom with people nearby                                           | N/A        | 30/10/2015      |     | Yes |
| Send flowers to people nearby and exchange received flowers for shopping cards | N/A        | 29/12/2015      |     | Yes |
| Scan QR code                                                                   | 21/01/2011 | 8/05/2013       | Yes |     |
| Email address                                                                  | 21/03/2011 | N/A             |     | Yes |
| Recommendation by Interpersonal circles (employers, schools and friends)       | 6/04/2011  | 5/05/2014       | Yes |     |
| Recommendation                                                                 | 6/04/2011  | 10/11/2011      | Yes |     |
| Shake                                                                          | 1/10/2011  | N/A             |     | Yes |
| Friend radar                                                                   | 26/01/2014 | 11/04/2015      | Yes |     |
| Create a group by multiple users inputting the same 4 numerical figures        | 8/05/2014  | N/A             |     | Yes |
| <b>Contact management</b>                                                      |            |                 |     |     |
| Classify into different categories                                             | 10/03/2011 | 25/08/2008      |     | Yes |
| Block contacts (blacklist)                                                     | 21/03/2011 | 30/03/2011      | Yes |     |
| Search a contact from chat history or contact book via text                    | 10/03/2011 | 3/08/2010       |     | Yes |
| Search a contact from contact book via voice                                   | 5/09/2012  | N/A             |     | Yes |
| Add remarks to contacts                                                        | 10/03/2011 | 7/06/2010       |     | Yes |
| Add descriptions and photos to a contact's remark                              | 26/01/2014 | Later           | Yes |     |
| Chat group's name card                                                         | 5/02/2013  | 4/01/2009       |     | Yes |
| Revise remarks of chat groups                                                  | 3/08/2011  | Later           | Yes |     |
| A Favourite Friends category of contact                                        | 19/04/2012 | 5/05/2014       | Yes |     |
| Add frequently contacted friends to desktop                                    | Later      | 25/07/2012      |     | Yes |
| <b>Personal profile</b>                                                        |            |                 |     |     |
| Personal profile                                                               | 21/01/2011 | 2000/4          |     | Yes |
| Change profile                                                                 | 21/01/2011 | 14/01/2008      |     | Yes |
| Upload avatars and photos to customize personal name card                      | 21/01/2011 | 12/01/2012      | Yes |     |
| Put multiple photos in personal name card                                      | N/A        | 16/07/2012      |     | Yes |
| Use a short video as avatar                                                    | N/A        | 16/09/2016      |     | Yes |
| Write and change What's up                                                     | 3/08/2011  | 26/10/2010      |     | Yes |
| QR-code name card                                                              | 14/12/2011 | 8/05/2013       | Yes |     |
| Add audio introduction to personal profile                                     | N/A        | 24/09/2013      |     | Yes |
| Customize personal profile background                                          | N/A        | 10/01/2014      |     | Yes |
| <b>Social page features</b>                                                    |            |                 |     |     |
| Text                                                                           | 19/04/2012 | 2007 or earlier |     | Yes |
| Photos                                                                         | 19/04/2012 | 2007 or earlier |     | Yes |
| Videos                                                                         | 19/04/2012 | 2007 or earlier |     | Yes |
| Shoot a video clip and post it to personal page                                | 30/09/2014 | 9/12/2014       | Yes |     |
| Hyperlinks                                                                     | 19/04/2012 | 2007 or earlier |     | Yes |
| Music                                                                          | Early on   | 2007 or earlier |     | Yes |
| Location                                                                       | 21/03/2014 | 3/07/2013       |     | Yes |
| Comment on yourself and friends' pages                                         | 19/07/2012 | Available       |     | Yes |
| Change pendants (e.g. weather forecast) of the page                            | N/A        | 24/09/2013      |     | Yes |
| Quick view and comment on the updates of Contacts' social pages                | 19/04/2012 | 9/11/2010       |     | Yes |

|                                                                                                                                                                                                                 |            |                               |     |     |
|-----------------------------------------------------------------------------------------------------------------------------------------------------------------------------------------------------------------|------------|-------------------------------|-----|-----|
| Translate texts in the page between English and Chinese                                                                                                                                                         | 25/05/2015 | N/A                           |     | Yes |
| Edit a video clip after shooting it and before sending it to chat/personal page                                                                                                                                 | N/A        | 14/07/2016                    |     | Yes |
| Social networking functions                                                                                                                                                                                     |            |                               |     |     |
| Drift bottle                                                                                                                                                                                                    | 1/10/2011  | N/A                           |     | Yes |
| Invite other SN app users to use the app                                                                                                                                                                        | 6/04/2011  | N/A                           |     | Yes |
| Invite email users to use the app                                                                                                                                                                               | 6/04/2011  | N/A                           |     | Yes |
| Share photos to other SN apps                                                                                                                                                                                   | 10/05/2011 | 9/11/2010                     | Yes |     |
| Share ID to other SN apps (e.g. Sina Weibo)                                                                                                                                                                     | 8/06/2011  | Available                     | Yes |     |
| Receive and reply to chat messages of other IM apps                                                                                                                                                             | 30/06/2011 | N/A                           |     | Yes |
| Sharing QR code to other SN apps (e.g. Facebook, Sina Weibo)                                                                                                                                                    | 14/12/2011 | Available                     | Yes |     |
| Integrate Tencent Weibo & News                                                                                                                                                                                  | 19/01/2012 | 2006 or earlier               |     | Yes |
| Game centre                                                                                                                                                                                                     | 5/08/2013  | 2006 or earlier               |     | Yes |
| Prepay mobile phone charge for friends                                                                                                                                                                          | 20/12/2013 | Later                         |     | Yes |
| Synchronize What's up to other SN apps                                                                                                                                                                          | N/A        | 26/10/2010                    |     | Yes |
| Create shared albums to share photos with multiple contacts                                                                                                                                                     | 21/03/2014 | 24/09/2013                    | Yes |     |
| Chat group management                                                                                                                                                                                           |            |                               |     |     |
| Shared space management (documents, albums, notices, calendar, votes, etc.)                                                                                                                                     | N/A        | 8/05/2013                     |     | Yes |
| Diverse group functions excluding payment (e.g. file transfer, sending and receiving gifts, voting, discussion topics, creating and joining in group activities, subscribing to interest tribes, playing games) | N/A        | Functions increased over time |     | Yes |
| Teacher-student chat groups for homework assignment and feedback                                                                                                                                                | N/A        | 6/08/2015                     |     | Yes |
| Preview compressed folders online                                                                                                                                                                               | N/A        | 14/07/2016                    |     | Yes |
| My Favourites                                                                                                                                                                                                   |            |                               |     |     |
| Edit contents saved in My Favourites                                                                                                                                                                            | 8/05/2014  | 9/12/2014                     | Yes |     |
| Create own records with texts & images in My Favourites                                                                                                                                                         | 1/09/2015  | Available                     |     |     |
| Save documents in your phone to My Favourites                                                                                                                                                                   | Available  | 12/12/2016                    |     |     |
| Payment                                                                                                                                                                                                         |            |                               |     |     |
| Payment with bank card                                                                                                                                                                                          | 5/08/2013  | 21/03/2014                    | Yes | Yes |
| Send and receive red packets in chat                                                                                                                                                                            | 28/01/2014 | 26/01/2015                    | Yes |     |
| Payment by tapping bank IC card                                                                                                                                                                                 | N/A        | 26/01/2015                    |     | Yes |
| Payment with QQ Coins                                                                                                                                                                                           | N/A        | 21/03/2014                    |     | Yes |
| Payment with Balance                                                                                                                                                                                            | 23/06/2014 | 21/03/2014                    |     | Yes |
| Transfer money                                                                                                                                                                                                  | 23/06/2014 | 26/01/2015                    | Yes |     |
| Sellers receive payment by scanning a user's QR code                                                                                                                                                            | 14/08/2014 | Later                         | Yes |     |
| Card wallet to put coupons, membership cards, movie tickets and air tickets etc.                                                                                                                                | 30/09/2014 | Later                         | Yes |     |
| Set hand password for payment                                                                                                                                                                                   | 30/09/2014 | 28/05/2016                    | Yes |     |
| Give payment rewards to sticker creators                                                                                                                                                                        | 19/10/2015 | Available                     |     |     |
| Make payments in chat groups                                                                                                                                                                                    | 25/10/2016 | Available                     |     |     |
| Send and receive red packets by scanning QR codes                                                                                                                                                               | 23/01/2017 | Available                     |     |     |
| Entertainment, Media, Smart life, online-to-offline functions                                                                                                                                                   |            |                               |     |     |

|                                                                                                        |            |                 |     |     |     |     |
|--------------------------------------------------------------------------------------------------------|------------|-----------------|-----|-----|-----|-----|
| Receive and read QQ emails                                                                             | 10/05/2011 | 2007 or earlier |     | Yes |     |     |
| Send emails with attachments                                                                           | 19/01/2012 | 3/07/2013       | Yes |     |     |     |
| Shake webpages from PC to your smartphone and shake the webpages to your contacts                      | 5/09/2012  | N/A             |     |     | Yes |     |
| Transfer files between PC and phone                                                                    | 19/07/2012 | 28/01/2013      | Yes |     |     |     |
| Short-distance high-speed file transfer via Wifi or Wifi hotspot                                       | N/A        | 5/05/2014       |     |     |     | Yes |
| 5M/B face-to-face file transfer                                                                        | N/A        | 12/09/2014      |     |     |     | Yes |
| 2GB file transfer to offline friends per day                                                           | N/A        | Available       |     |     |     | Yes |
| Upload files to Cloud                                                                                  | N/A        | Available       |     |     |     | Yes |
| Synchronize voice notes to QQ Mail                                                                     | 27/10/2011 | N/A             |     |     | Yes |     |
| Transfer chat data to email                                                                            | 24/10/2013 | N/A             |     |     | Yes |     |
| Transfer chat data to SD card                                                                          | Available  | 9/11/2010       |     | Yes |     |     |
| Capture phone screenshots                                                                              | 5/02/2013  | 16/12/2011      |     | Yes |     |     |
| Switch between landscape and portrait display                                                          | Later      | 27/04/2010      |     | Yes |     |     |
| Edit photos                                                                                            | 8/06/2011  | 3/07/2013       | Yes |     |     |     |
| Add locations to photos                                                                                | Later      | 3/07/2013       |     | Yes |     |     |
| After taking a photo, edit it before sending to chat or posting to Moments                             | 20/12/2016 | 14/07/2016      |     | Yes |     |     |
| Search restaurants                                                                                     | 19/01/2015 | 22/03/2012      |     | Yes |     |     |
| E-book reading                                                                                         | N/A        | 24/09/2013      |     |     |     | Yes |
| Scan any QR code                                                                                       | 5/09/2012  | Later           | Yes |     |     |     |
| Scan barcodes                                                                                          | 5/08/2013  | N/A             |     |     | Yes |     |
| Scan book covers                                                                                       | 5/08/2013  | N/A             |     |     | Yes |     |
| Scan streets                                                                                           | 5/08/2013  | N/A             |     |     | Yes |     |
| Scan words and translate between Chinese and English                                                   | 5/08/2013  | N/A             |     |     | Yes |     |
| Scan and save business cards                                                                           | N/A        | 1/04/2016       |     |     |     | Yes |
| Scan augmented-reality (to win lucky money)                                                            | N/A        | 17/01/2017      |     |     |     | Yes |
| Shake to search music                                                                                  | 5/02/2013  | N/A             |     |     | Yes |     |
| Shake to win red packets                                                                               | 19/01/2015 | N/A             |     |     | Yes |     |
| Shake to search TV programs                                                                            | 19/01/2015 | N/A             |     |     | Yes |     |
| Shake to plot a concert programs                                                                       | 2015/~     | N/A             |     |     | Yes |     |
| Identify QR codes in pictures                                                                          | 14/08/2014 | N/A             |     |     | Yes |     |
| Recognize QR codes in pictures to scan QR codes without saving them first into phones                  | 14/08/2014 | Later           | Yes |     |     |     |
| Official account                                                                                       | 19/07/2012 | 3/07/2013       | Yes |     |     |     |
| Official accounts push messages to subscribers                                                         | 20/07/2012 | N/A             |     |     | Yes |     |
| Customize the app theme                                                                                | N/A        | 3/07/2013       |     |     |     | Yes |
| Sticker store                                                                                          | 5/08/2013  | 3/07/2013       |     | Yes |     |     |
| Integrate payment with multiple daily life services                                                    | 26/01/2014 | 21/03/2014      | Yes |     |     |     |
| Record health status                                                                                   | 30/03/2015 | 12/09/2014      |     | Yes |     |     |
| Walk ranking and donating walk distance                                                                | 21/03/2016 | Available       |     |     |     |     |
| The Internet of things                                                                                 | 5/09/2015  | 26/01/2015      |     | Yes |     |     |
| Mini App allowing users to use various services, goods, devices but not install the corresponding apps | 9/01/2017  | N/A             |     |     | Yes |     |
| Versions for wearable devices (e.g. Apple Watch)                                                       | 30/03/2015 | 12/05/2015      | Yes |     |     |     |
| Web-based version                                                                                      | 19/07/2012 | 2009/9/~        |     | Yes |     |     |
| SUM                                                                                                    |            |                 | 57  | 51  | 36  | 54  |

Note: The table is built on various public resources, mainly on Tencent's official information (e.g. Mobile QQ Team, 1998-2017; WeChat Group, 2011-2017).

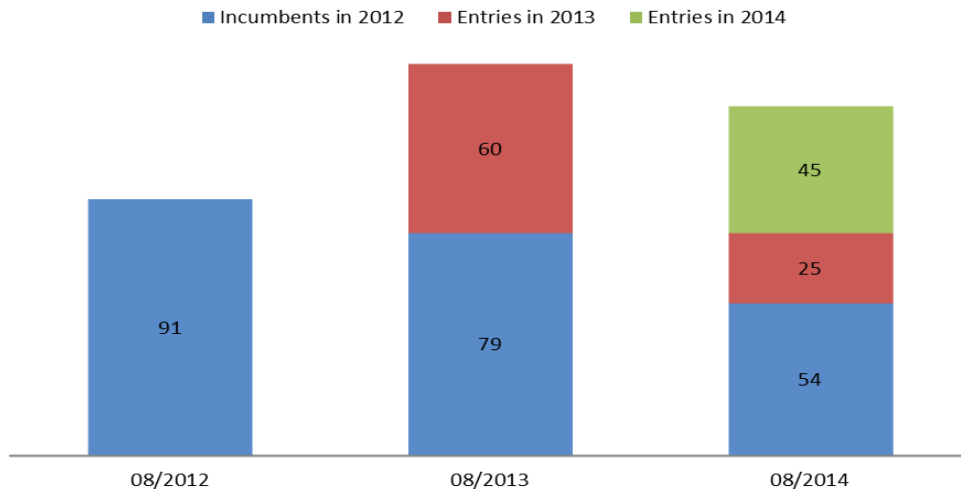

**Figure A2. Entries and exits of smartphone-based IM apps in the Chinese market (Aug 2012-Aug 2014)**

Note: The diagram is built on iResearch Inc. (2012), which is a database tracking the real-time usage of smartphone-based apps of Chinese smartphone users aged between 18 and 60 years around the clock day by day. The available data starts from Aug 2012. We collected data till Oct 2014 in Dec 2014. Names and monthly unique users of specific apps are listed in Table A1.

**Table A2. The number of monthly unique users of smartphone-based IM apps in China (Aug 2012-Aug 2014) (Unit: 10 thousand)**

| SN | App name            | Aug 2012  | Aug 2013  | Aug 2014  |
|----|---------------------|-----------|-----------|-----------|
| 1  | WeChat              | 8,288.67  | 18,982.68 | 29,857.03 |
| 2  | Mobile QQ           | 12,056.79 | 19,829.76 | 26,636.11 |
| 3  | Wangxin             | 778.63    | 2,501.68  | 5,550.34  |
| 4  | Laiwang             | #N/A      | 56.03     | 4,435.83  |
| 5  | Yixin               | #N/A      | 1,883.87  | 3,867.59  |
| 6  | Uxin                | 488.41    | 2,874.60  | 2,939.11  |
| 7  | Fetion              | 2,530.43  | 2,458.80  | 1,389.77  |
| 8  | Uwewe               | 227.71    | 810.81    | 1,271.33  |
| 9  | YY Voice            | 428.27    | 696.84    | 1,088.02  |
| 10 | QQ Lite             | #N/A      | #N/A      | 686.35    |
| 11 | Ailiao              | 429.31    | 1,032.36  | 684.67    |
| 12 | Youni               | 806.17    | 855.97    | 600.99    |
| 13 | Laidiantong         | 931.01    | 646.86    | 594.78    |
| 14 | Line                | 31.74     | 658.67    | 467.83    |
| 15 | CloudCall Free VoIP | 52.15     | 451.85    | 457.29    |
| 16 | Wemeet              | #N/A      | #N/A      | 422.88    |
| 17 | Xiaohuoban          | #N/A      | #N/A      | 364.5     |
| 18 | Google Talk         | 295.03    | 201.01    | 356.01    |
| 19 | Tiantianliao        | 38.65     | 103.64    | 350.27    |
| 20 | Fetion lite         | 245.12    | 247.17    | 349.58    |
| 21 | Yudian              | 124.2     | 254.41    | 337.16    |
| 22 | MiTalk              | 1,022.37  | 705.14    | 327.86    |
| 23 | Skype               | 211.35    | 230.08    | 315.89    |
| 24 | Samsung ChatON      | #N/A      | 144.43    | 306.67    |
| 25 | IShow               | #N/A      | #N/A      | 306.17    |
| 26 | Jijia               | #N/A      | #N/A      | 301.33    |
| 27 | GO                  | 336.98    | 303.3     | 247.33    |
| 28 | bangbang zhanggui   | #N/A      | #N/A      | 220.4     |
| 29 | vhua                | #N/A      | #N/A      | 220.06    |
| 30 | yxhuying            | #N/A      | #N/A      | 216.03    |
| 31 | Weihui              | #N/A      | #N/A      | 203.29    |
| 32 | Tonghualuyin        | 46.54     | 78.38     | 197.99    |
| 33 | 3Gdh                | #N/A      | #N/A      | 187.2     |
| 34 | Feiin               | 70.89     | 271.44    | 164.1     |
| 35 | Whatsapp messenger  | 84.51     | 91.24     | 159.29    |
| 36 | SKY                 | 98.28     | 123.56    | 150.94    |
| 37 | Kcshengqian         | 51.98     | 271.18    | 149.14    |
| 38 | Handbb              | 19.15     | 177.42    | 134.6     |
| 39 | AliCall             | 14.57     | 8.96      | 123.4     |
| 40 | Callme              | #N/A      | 77.39     | 120.59    |
| 41 | Bitesms             | 122.3     | 88.74     | 111.74    |
| 42 | 51375               | 77.69     | 125.87    | 106.87    |
| 43 | 4Gdh                | #N/A      | 100.94    | 101.65    |
| 44 | Viber               | 62.91     | 91.59     | 98.26     |
| 45 | Tuotuo              | #N/A      | 93.07     | 93.39     |
| 46 | Kcwangluo           | 35.3      | 384.53    | 91.45     |
| 47 | Ipaychat            | 30.82     | #N/A      | 90.53     |
| 48 | Alitongxin          | #N/A      | #N/A      | 85.67     |
| 49 | italk24             | #N/A      | 119.77    | 79.73     |
| 50 | hcsql               | #N/A      | 79.26     | 73.98     |
| 51 | Maike               | #N/A      | #N/A      | 73.54     |
| 52 | Inbilin             | #N/A      | 179.02    | 70.38     |
| 53 | Kakao Talk          | 17.32     | 46.15     | 60.63     |
| 54 | UU                  | 54.27     | 195.21    | 56.14     |
| 55 | Duoliao             | #N/A      | 32.21     | 54.69     |
| 56 | Tianxiatong         | #N/A      | #N/A      | 53.01     |
| 57 | V3                  | #N/A      | #N/A      | 52.87     |
| 58 | Fscall              | #N/A      | 133.22    | 46.3      |
| 59 | Yiliao              | 414.5     | 486.6     | 44.39     |
| 60 | Savecall            | #N/A      | 24.05     | 41.48     |
| 61 | Mianfeiquanqitong   | #N/A      | 189.83    | 40.87     |
| 62 | Wali SMS            | 87.25     | 26.29     | 40.59     |
| 63 | Moca                | #N/A      | #N/A      | 40.47     |

|     |                                |          |        |       |
|-----|--------------------------------|----------|--------|-------|
| 64  | Baidu Hi                       | #N/A     | #N/A   | 39.24 |
| 65  | 4Gdh                           | #N/A     | #N/A   | 37.93 |
| 66  | Feiliao                        | 422.21   | 265.22 | 37.05 |
| 67  | eliaowldh                      | 31.2     | 89.33  | 36.09 |
| 68  | Callda                         | #N/A     | 6.62   | 35    |
| 69  | Xunliao                        | #N/A     | #N/A   | 34.98 |
| 70  | 365anycall                     | #N/A     | #N/A   | 34.76 |
| 71  | Yibeicall                      | #N/A     | 10.24  | 34.18 |
| 72  | Dongeyixin                     | #N/A     | 11.29  | 33.25 |
| 73  | Changbo                        | #N/A     | #N/A   | 33.1  |
| 74  | Zhufutixing                    | 81.08    | 155.57 | 32.38 |
| 75  | Souba                          | #N/A     | #N/A   | 29.93 |
| 76  | 360Tonghua                     | #N/A     | 104.81 | 28.67 |
| 77  | QQvoice                        | 41.87    | 58.17  | 27.72 |
| 78  | Okboo                          | #N/A     | 12.46  | 26.74 |
| 79  | Zhaopengyou                    | 89.06    | 68.28  | 25.95 |
| 80  | Maai Beta                      | 76.04    | 30.04  | 25.06 |
| 81  | MiMiCall                       | #N/A     | 23.04  | 24.99 |
| 82  | Android SMS                    | 29.27    | 17.53  | 23.62 |
| 83  | HandcentSMS                    | 86.05    | 55.72  | 23.57 |
| 84  | Xiaoxuntong Assistant          | #N/A     | 89.27  | 23.3  |
| 85  | Kuaibo                         | #N/A     | 15.45  | 20.66 |
| 86  | AliWangwang for Taobao sellers | #N/A     | 145.43 | 20.39 |
| 87  | Huixin                         | #N/A     | #N/A   | 20.21 |
| 88  | VVCall                         | #N/A     | #N/A   | 19.88 |
| 89  | Shengqiandianhuabao            | #N/A     | 21.39  | 19.17 |
| 90  | Duoqu Zhufuduanxin             | #N/A     | 10.62  | 19.05 |
| 91  | ETsmssprite                    | 10.1     | 10.1   | 18.18 |
| 92  | G3tonghua                      | #N/A     | 40.53  | 17.53 |
| 93  | 3Gwldh                         | 137.54   | 229.49 | 17.25 |
| 94  | Duanxintong                    | 74.21    | 27.73  | 17.24 |
| 95  | Alitong                        | 107.9    | 149.99 | 15.73 |
| 96  | WiFiwldh                       | #N/A     | #N/A   | 14.88 |
| 97  | Sovi                           | #N/A     | #N/A   | 13.27 |
| 98  | Duoqu SMS                      | #N/A     | 24.3   | 13.19 |
| 99  | Yibo                           | #N/A     | #N/A   | 13.06 |
| 100 | Handbb jisu                    | #N/A     | 24.5   | 11.55 |
| 101 | Kuhuawang                      | 5.25     | 27.85  | 11.45 |
| 102 | Kaakoo                         | #N/A     | 51.21  | 10.38 |
| 103 | 139talk                        | 23.84    | 18.62  | 10.22 |
| 104 | Huatong                        | #N/A     | #N/A   | 9.8   |
| 105 | Diaosi                         | #N/A     | 22.55  | 9.65  |
| 106 | Xianzhen Sip                   | #N/A     | 5.05   | 9.53  |
| 107 | Yunhao                         | #N/A     | 94.41  | 9.28  |
| 108 | hello                          | #N/A     | #N/A   | 9.09  |
| 109 | Tongtong                       | 261.51   | 105.87 | 9.09  |
| 110 | Xiuba app                      | #N/A     | 16.35  | 8.94  |
| 111 | Jiuzhoutong                    | 35.5     | 50.65  | 8.51  |
| 112 | ETfetion                       | 23.23    | 19.19  | 8.34  |
| 113 | Taodianhua                     | #N/A     | #N/A   | 7.19  |
| 114 | 4Gdh-shenzhen                  | #N/A     | #N/A   | 7.19  |
| 115 | Mobile MSN Messenger           | 145.05   | 73.46  | 7.12  |
| 116 | Duodadianhua                   | #N/A     | #N/A   | 7.07  |
| 117 | Changliaotong                  | #N/A     | #N/A   | 7.07  |
| 118 | Facebook Messenger             | #N/A     | #N/A   | 7.07  |
| 119 | Sqt001                         | 61.77    | 27.34  | 6.54  |
| 120 | Free call                      | #N/A     | 24.94  | 6.26  |
| 121 | MobileVOIP                     | #N/A     | 23.45  | 6.06  |
| 122 | Yueyuetong                     | #N/A     | #N/A   | 6.06  |
| 123 | Xinxipaopao                    | 14.23    | 10.33  | 6.06  |
| 124 | Wexin selection                | #N/A     | 13.23  | 5.39  |
| 125 | Linphone                       | 211.7    | 932.01 | #N/A  |
| 126 | Google Voice                   | 1,044.53 | 668.11 | #N/A  |
| 127 | PHONE+                         | 132      | 270.26 | #N/A  |
| 128 | BBQ                            | 16.81    | 6.63   | #N/A  |
| 129 | Sina Weiyou                    | 15.06    | 61.57  | #N/A  |
| 130 | HYDRA                          | 67.15    | 52.63  | #N/A  |

|     |                         |        |        |      |
|-----|-------------------------|--------|--------|------|
| 131 | Yunhaoma                | 7.95   | 49.45  | #N/A |
| 132 | Weiyou                  | 24.3   | 37     | #N/A |
| 133 | Efenliao                | 20.11  | 22.88  | #N/A |
| 134 | Tiantian                | 10.71  | 21.96  | #N/A |
| 135 | Baidutong               | 118.5  | 20.04  | #N/A |
| 136 | SIP139                  | 5.69   | 17.46  | #N/A |
| 137 | Voice360                | 56.81  | 15.47  | #N/A |
| 138 | Ehu                     | 122.45 | 15.47  | #N/A |
| 139 | Freecall                | 34.82  | 13.86  | #N/A |
| 140 | Kktalk Messenger        | 29.76  | 13.54  | #N/A |
| 141 | Gexin                   | 47.26  | 13.37  | #N/A |
| 142 | Sixin                   | 297.57 | 12.41  | #N/A |
| 143 | SMS Backup+             | 7.07   | 7.15   | #N/A |
| 144 | Hupan                   | 34.15  | 6.93   | #N/A |
| 145 | Wo                      | 44.34  | 11.79  | #N/A |
| 146 | Groupsms                | 19.52  | 11.64  | #N/A |
| 147 | Voice sms               | 10.22  | 9.45   | #N/A |
| 148 | Tango                   | 6.93   | 8.76   | #N/A |
| 149 | 66call                  | 8      | 7.77   | #N/A |
| 150 | Mianfeibodianhua        | #N/A   | 234.03 | #N/A |
| 151 | Bameiliao               | #N/A   | 65.78  | #N/A |
| 152 | VoIPFree                | #N/A   | 61.27  | #N/A |
| 153 | Yixin-Jincheng          | #N/A   | 38.44  | #N/A |
| 154 | 9158                    | #N/A   | 32.06  | #N/A |
| 155 | Huhuk                   | #N/A   | 24.26  | #N/A |
| 156 | 200call                 | #N/A   | 23.68  | #N/A |
| 157 | Wexin Navigator         | #N/A   | 23.32  | #N/A |
| 158 | Youletong               | #N/A   | 22.32  | #N/A |
| 159 | Yikuaitong              | #N/A   | 20.04  | #N/A |
| 160 | JYSphone                | #N/A   | 18.27  | #N/A |
| 161 | Dingding                | #N/A   | 17.96  | #N/A |
| 162 | indoona                 | #N/A   | 15.2   | #N/A |
| 163 | Ephone                  | #N/A   | 14.05  | #N/A |
| 164 | Google Hangouts         | #N/A   | 12.83  | #N/A |
| 165 | Jego                    | #N/A   | 10.41  | #N/A |
| 166 | Caiyin                  | #N/A   | 8.82   | #N/A |
| 167 | 51375 group call        | #N/A   | 7.52   | #N/A |
| 168 | 3Gdianhuatong           | #N/A   | 6.37   | #N/A |
| 169 | Youkeshengqianbao       | #N/A   | 6.22   | #N/A |
| 170 | Weiyuyin                | #N/A   | 6.06   | #N/A |
| 171 | Sunultimate             | #N/A   | 5.67   | #N/A |
| 172 | Jierizhufuduanxindaquan | #N/A   | 5.05   | #N/A |
| 173 | AOL AIM                 | #N/A   | 5.05   | #N/A |
| 174 | MMS reader              | #N/A   | 5.05   | #N/A |
| 175 | Chaojidianxin Bomber    | 12.63  | #N/A   | #N/A |
| 176 | Guojidianxin            | 11.31  | #N/A   | #N/A |
| 177 | Pansi SMS               | 8.08   | #N/A   | #N/A |
| 178 | Changletong             | 42.14  | #N/A   | #N/A |
| 179 | btcall                  | 13.54  | #N/A   | #N/A |
| 180 | IM+                     | 51.33  | #N/A   | #N/A |
| 181 | EBUDDY                  | 24.77  | #N/A   | #N/A |
| 182 | iMiChat                 | 9.09   | #N/A   | #N/A |
| 183 | Iphone QQ Duokai        | 8.34   | #N/A   | #N/A |
| 184 | Iphone qq 24hours       | 7.07   | #N/A   | #N/A |
| 185 | Jiongxin                | 36.28  | #N/A   | #N/A |
|     | Total number of IM apps | 91     | 139    | 124  |

Note: The table is built on iResearch Inc. (2012). Monthly unique users are those who use a given app at least one time in a given month. A user using the app for more than one time is still counted as one user. “#N/A” means the app was not available at that point in time. The apps highlighted in grey are the leading IM apps developed by foreign firms.

**Table A3. The number of monthly unique users of social networking services apps in China (Aug 2012-Aug 2014) (Unit: 10 thousand)**

| SN | App             | Aug-12   | Aug-13   | Aug-14   |
|----|-----------------|----------|----------|----------|
| 1  | Qzone           | 4,215.94 | 6,512.07 | 5,552.50 |
| 2  | RENN            | 1,801.29 | 2,533.99 | 1,968.89 |
| 3  | Kaixinwang      | 339.75   | 176.67   | 37.5     |
| 4  | Friends Network | 221.84   | 196.02   | 52.08    |
| 5  | GOOGLE+         | 101.04   | 170.81   | 93.54    |
| 6  | FACEBOOK        | 99.79    | 288.31   | 215.62   |
| 7  | Chirp           | 45.78    | 17.98    | #N/A     |
| 8  | Weifaxian       | 27.16    | #N/A     | #N/A     |
| 9  | Duitang         | 25.92    | 163.46   | 192.97   |
| 10 | Feizan          | 19.13    | 38.38    | 21.22    |
| 11 | LinkedIn        | 19.09    | 26.91    | 59.26    |
| 12 | BeginShare      | 14.44    | #N/A     | #N/A     |
| 13 | Yemao           | 9.57     | #N/A     | #N/A     |
| 14 | Mobile MOMO     | 8.95     | #N/A     | #N/A     |
| 15 | Niupai          | 8.08     | 31.55    | #N/A     |
| 16 | Daka            | 7.27     | #N/A     | #N/A     |
| 17 | Douliu          | 6.2      | 9.09     | #N/A     |
| 18 | Xiaoenai        | 6.06     | 135.31   | 95.15    |
| 19 | Douyou          | #N/A     | 84.51    | #N/A     |
| 20 | Liangbuluquanzi | #N/A     | 63.01    | #N/A     |
| 21 | Who?Now!        | #N/A     | 53.48    | 83.95    |
| 22 | It's me!        | #N/A     | 33.83    | #N/A     |
| 23 | iShejjiao       | #N/A     | 21       | 15.35    |
| 24 | Path            | #N/A     | 17.32    | 14.05    |
| 25 | Demai           | #N/A     | 16.82    | #N/A     |
| 26 | Wanpai          | #N/A     | 13.13    | #N/A     |
| 27 | Guanxiwang      | #N/A     | 11.68    | #N/A     |
| 28 | 51 Space        | #N/A     | 11.11    | 6.39     |
| 29 | Gexing          | #N/A     | 5.05     | #N/A     |
| 30 | Qupai           | #N/A     | #N/A     | 286.65   |
| 31 | Fenmuer         | #N/A     | #N/A     | 131.3    |
| 32 | Youmi           | #N/A     | #N/A     | 118      |
| 33 | Simiquan        | #N/A     | #N/A     | 117.61   |
| 34 | Qiaoqiao        | #N/A     | #N/A     | 116.51   |
| 35 | Hangouts        | #N/A     | #N/A     | 113.91   |
| 36 | Blued 2013      | #N/A     | #N/A     | 112.24   |
| 37 | Ji              | #N/A     | #N/A     | 91.35    |
| 38 | Soap Comic      | #N/A     | #N/A     | 84.89    |
| 39 | Xiaobalaile     | #N/A     | #N/A     | 73.91    |
| 40 | Kupao           | #N/A     | #N/A     | 72.28    |

|              |               |      |      |       |
|--------------|---------------|------|------|-------|
| 41           | Mika          | #N/A | #N/A | 66.87 |
| 42           | TTWX          | #N/A | #N/A | 43.77 |
| 43           | Kaomi         | #N/A | #N/A | 33.9  |
| 44           | NSJNQC        | #N/A | #N/A | 26.66 |
| 45           | Qingchifan    | #N/A | #N/A | 25.51 |
| 46           | Hiliao        | #N/A | #N/A | 20.03 |
| 47           | Kugou Fanxing | #N/A | #N/A | 17.59 |
| 48           | Foursquare    | #N/A | #N/A | 12.12 |
| 49           | Xiaonei Mimi  | #N/A | #N/A | 8.2   |
| 50           | AA Social     | #N/A | #N/A | 5.18  |
| Total        |               | 18   | 24   | 35    |
| Incumbents   |               |      | 13   | 14    |
| New entrants |               |      | 11   | 21    |
| Exits        |               |      | 5    | 15    |

Note: The table is built on iResearch Inc. (2012). Monthly unique users are those who use a given app at least one time in a given month. A user using the app for more than one time is still counted as one user. “#N/A” means the app was not available at that point in time. The apps highlighted in grey are the leading apps developed by foreign firms.

**Table A4. The number of monthly unique users of microblogging apps in China (Aug 2012-Aug 2014) (Unit: 10 thousand)**

| SN | App name          | Aug-12   | Aug-13    | Aug-14    |
|----|-------------------|----------|-----------|-----------|
| 1  | Sina Weibo        | 6,326.84 | 8,310.91  | 11,279.91 |
| 2  | Tencent Weibo     | 842.46   | 834.45    | 1,093.63  |
| 3  | Weijingxuan       | 166.94   | 219.2     | 132.83    |
| 4  | <b>TWITTER</b>    | 102.92   | 123.41    | 98.52     |
| 5  | Weico             | 70.48    | 297.36    | 326.81    |
| 6  | Mobile Weibo      | 51.46    | 42.57     | 6.06      |
| 7  | Sina Red Weibo    | 50.34    | 8.95      | #N/A      |
| 8  | Weibotong         | 34.67    | 20.95     | #N/A      |
| 9  | Diandian          | 20.2     | 5.05-5.48 | 8.88      |
| 10 | YiBo              | 19.83    | #N/A      | #N/A      |
| 11 | Netease Weibo     | 11.99    | 6.49      | 5.33      |
| 12 | Sohu Weibo        | 11.31    | 25.77     | #N/A      |
| 13 | Lofter            | 9.09     | 59.56     | 194.6     |
| 14 | Muzhiwan          | #N/A     | 67.8      | 10.48     |
| 15 | Huaban            | #N/A     | 19.92     | 5.45      |
| 16 | Moke              | #N/A     | 15.44     | 13.28     |
| 17 | Weibo Subscribe   | #N/A     | 10.48     | #N/A      |
| 18 | Lebo              | #N/A     | 8.4       | #N/A      |
| 19 | VG                | #N/A     | 8.01      | #N/A      |
| 20 | <b>Tumblr</b>     | #N/A     | #N/A      | 41.87     |
| 21 | Baidu Tieba Youth | #N/A     | #N/A      | 32.89     |
|    | Total             | 13       | 18        | 14        |
|    | Incumbents        |          | 12        | 12        |
|    | New entrants      |          | 6         | 2         |
|    | Exits             |          | 1         | 7         |

Note: The table is built on iResearch Inc. (2012). Monthly unique users are those who use a given app at least one time in a given month. A user using the app for more than one time is still counted as one user. “#N/A” means the app was not available at that point in time. The apps highlighted in grey are the leading apps developed by foreign firms.

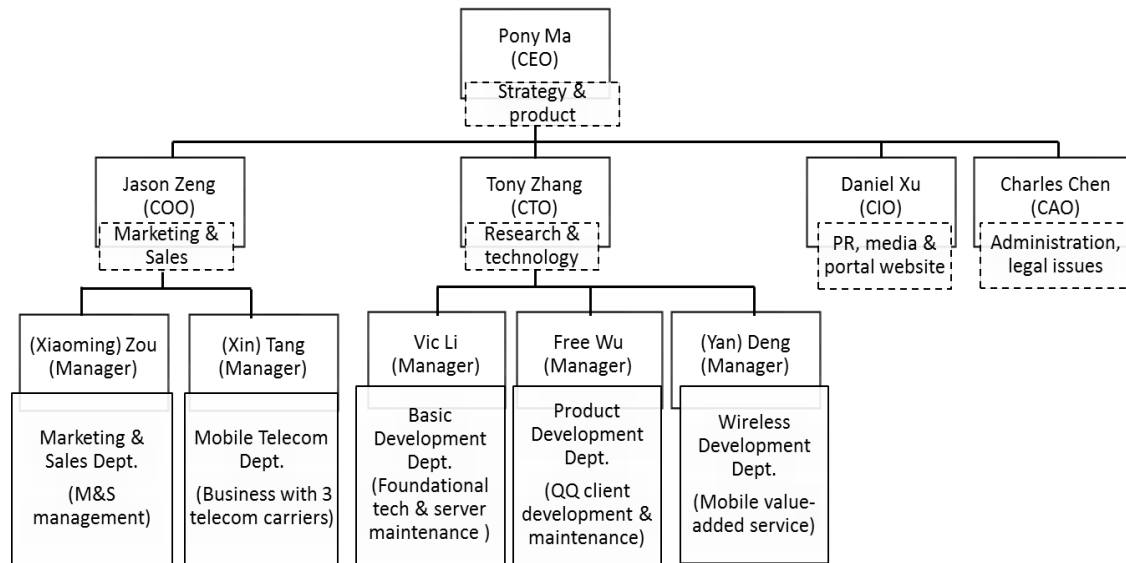

**Figure A3. Tencent's organizational structure (2002)**

Note: The Basic Development Dept., Product Development Dept., and the Wireless Development Dept. are the bases of the consequent firm-level R&D divisions, namely Platform R&D system (R) and Operation Platform System (O) between 2005 and May 17 2012 (as shown in Figure A4), and afterwards the Technology & Engineering Group (TEG) (as shown in Figure A5).

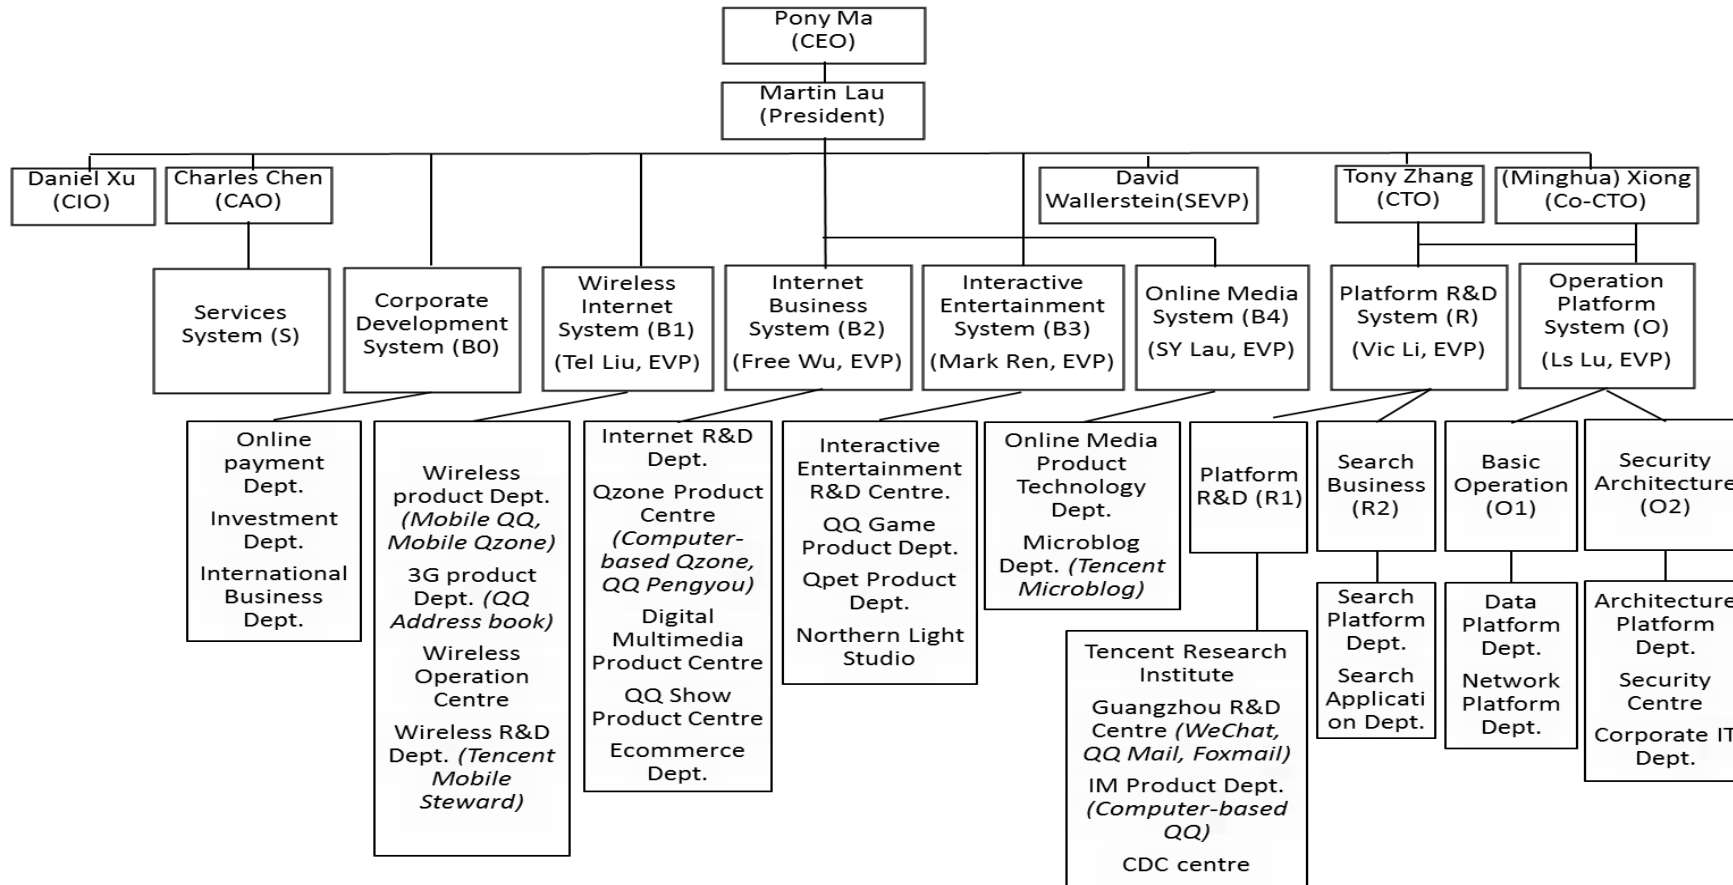

Figure A4. Tencent's organizational structure (Oct 24 2005-May 17 2012)

Note: (1) Tencent made its first major change in organizational structure in 2005. The simple structure was divided into eight divisions, including five business divisions (represented as B0-B4) and three supporting divisions (represented as R, O and S). The five business divisions (B0-B4) took charge of their respective business growth and possessed their own R&D and other functional departments. The three supporting divisions (R, O and S) were responsible for R&D, platform operation and functional services at the firm level. (2) Computer-based QQ and Mobile QQ belonged to two business divisions (R1 and B1) although they were virtually the same IM app for two types of terminals. The WeChat team was in Guangzhou R&D Center under the department of Platform R&D (R1) within the firm-level R&D division (R). (3) Data source: The author's summary of public data (e.g. Chen, Zhou, & Feng, 2012; Sina Science and Technology, 2012; Wu, 2016).

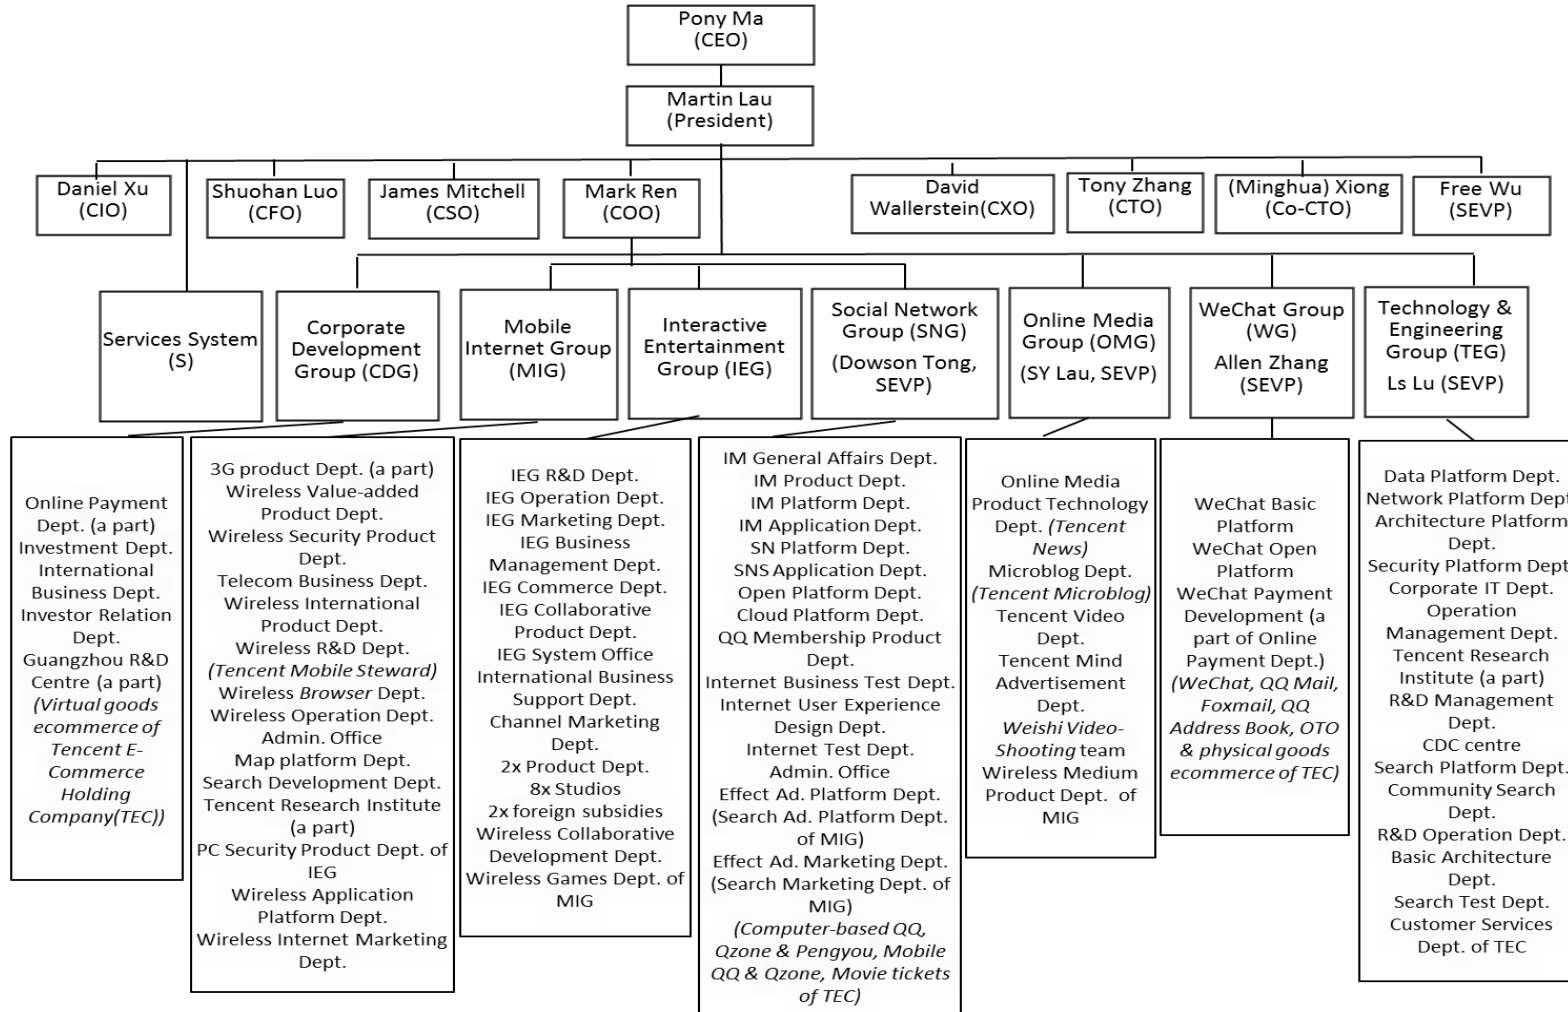

**Figure A5. Tencent's organizational structure (May 6 2014- Now)**

Note: (1) As WeChat succeed and Mobile QQ declined in relatively terms, Tencent changed its structure again in 2014. The WeChat team was promoted to a large division, whereas the previously large division responsible for Mobile QQ (namely Wireless Internet System B1) was divided and the Mobile QQ team was merged to another division (namely Social Network Group). (2) The division Technology & Engineering Group was combined from the previous two supporting divisions (R and O) and still took charge of firm-level R&D. (3) Data source: The author's summary of Tencent's company announcement and multiple public sources.

## REFERENCES

- Chen, X., Zhou, F., & Feng, Y. 2012. "Perpetual Penguin" quests for new impetus: Tencent's war against its ego (in Chinese), *Nanfang Weekend*. Shenzhen & Guangzhou, China: Nanfang Media Group.
- iResearch Inc. 2012. mUserTracker database (in Chinese). China: iResearch Inc.
- Mobile QQ Team. 1998-2017. Mobile QQ updates (in Chinese), Vol. 2014. Shenzhen, China: Tencent Holdings Limited.
- Sina Science and Technology. 2012. Tencent: Before reorganization (in Chinese), Vol. 2014: Sina Corporation.
- WeChat Group. 2011-2017. WeChat Update Logs (in Chinese) Vol. 2014: Tencent Holdings Limited.
- Wu, X. 2016. *Tencent Biography over 1998-2016: The Evolution of Chinese Internet Firms (in Chinese)* (WeRead ed.). Hangzhou, China: Zhejiang University Press.
